# Supplementary material for: A Quadruplex qPCR for Detection and Differentiation of Classic and Natural Recombinant Myxoma Virus Strains of Leporids
Source: MDPI journal article supplement (doi:10.3390/ijms222112052), 2021-11-07
Supplement: s1 [file s1]

**Table S1.** *In silico* and *in vitro* analyses of the qPCR systems against representative sequences retrieved from NCBI database.

| Strain / Isolate                   | Country        | Year | Ac. Number | AMPLIFICATION WITH              |                     |                     | Type of analysis |
|------------------------------------|----------------|------|------------|---------------------------------|---------------------|---------------------|------------------|
|                                    |                |      |            | <i>m000.5L/R</i> system         | <i>m009L</i> system | <i>m060L</i> system |                  |
| Brazil/Campinas/1949/1             | Brazil         | 1949 | KY548791   | Yes                             | Yes                 | No                  | <i>In silico</i> |
| Brazil/Campinas/1949/1             | Brazil         | 1949 | JX565570   | Yes                             | Yes                 | No                  | <i>In silico</i> |
| Lausanne                           | Switzerland    | 1949 | KY548791   | Yes                             | Yes                 | No                  | <i>In silico</i> |
| SLS/1950 (Moses strain/strain B)   | Brazil         | 1950 | JX565574   | Yes                             | Yes                 | No                  | <i>In silico</i> |
| SLS (Moses strain/strain B)        | Brazil         | 1950 | JX565574   | Yes                             | Yes                 | No                  | <i>In silico</i> |
| MSW, California/San Francisco 1950 | California     | 1950 | KF148065   | No                              | No                  | No                  | <i>In silico</i> |
| Aust/Dubbo/2-51/1                  | Australia      | 1951 | JX565567   | Yes                             | Yes                 | No                  | <i>In silico</i> |
| Aust/Dubbo/2-51/1                  | Australia      | 1951 | JX565567   | Yes                             | Yes                 | No                  | <i>In silico</i> |
| Aust/Corowa/12-52/2                | Australia      | 1952 | JX565569   | Yes                             | Yes                 | No                  | <i>In silico</i> |
| Aust/Corowa/12-52/2                | Australia      | 1952 | JX565569   | Yes                             | Yes                 | No                  | <i>In silico</i> |
| Aust/Uriarra/2-53/1                | Australia      | 1953 | JX565577   | Yes                             | Yes                 | No                  | <i>In silico</i> |
| Aust/Uriarra/2-53/1                | Australia      | 1953 | JX565577   | Yes                             | Yes                 | No                  | <i>In silico</i> |
| England/Cornwall/4-54/1            | Cornwall, UK   | 1954 | JX565566   | Yes                             | Yes                 | No                  |                  |
| England/Sussex/9-54/1              | Sussex, UK     | 1954 | KC660084   | Yes                             | Yes                 | No                  | <i>In silico</i> |
| England/Sussex/9-54/1              | UK             | 1954 | KC660084   | Yes                             | Yes                 | No                  | <i>In silico</i> |
| England/Cornwall/4-54/1            | UK             | 1954 | JX565566   | Yes                             | Yes                 | No                  | <i>In silico</i> |
| England/Nottingham/4-55/1          | Nottingham, UK | 1955 | JX565572   | Yes                             | Yes                 | No                  | <i>In silico</i> |
| Belfast/1955                       | Ireland        | 1955 | KY548792   | Yes                             | Yes                 | No                  | <i>In silico</i> |
| England/Nottingham/4-55/1          | UK             | 1955 | JX565572   | Yes                             | Yes                 | No                  | <i>In silico</i> |
| Belfast                            | Ireland        | 1955 | KY548792   | Yes                             | Yes                 | No                  | <i>In silico</i> |
| Germany/Munich/1985                | Germany        | 1985 | KP723387   | Yes                             | No                  | No                  | <i>In silico</i> |
| Poland/ZA/1985                     | Poland         | 1985 | KP723386   | Yes<br>(1 mis A/G in the probe) | Yes                 | No                  | <i>In silico</i> |
| Aust/NSW/Avenel/11-1990            | Australia      | 1990 | MK388104   | Yes                             | Yes                 | No                  | <i>In silico</i> |
| Aust/Meby/8-91                     | Australia      | 1991 | JX565571   | Yes                             | Yes                 | No                  | <i>In silico</i> |
| Aust/Gungahlin/1-91                | Australia      | 1991 | JX565568   | Yes                             | Yes                 | No                  | <i>In silico</i> |
| Aust/Southwell Hill/9-92/1         | Australia      | 1992 | JX565576   | Yes                             | Yes                 | No                  | <i>In silico</i> |
| Aust/Bendigo/7-92                  | Australia      | 1992 | JX565565   | Yes                             | Yes                 | No                  | <i>In silico</i> |
| Aust/Southwell Hill/9-92/1         | Australia      | 1992 | JX565576   | Yes                             | Yes                 | No                  | <i>In silico</i> |

|                                |           |      |          |                                    |                                                   |    |                  |
|--------------------------------|-----------|------|----------|------------------------------------|---------------------------------------------------|----|------------------|
| Aust/Bendigo/7-92              | Australia | 1992 | JX565565 | Yes                                | Yes                                               | No | <i>In silico</i> |
| Aust/Brooklands/4-93           | Australia | 1993 | JX565562 | Yes                                | Yes                                               | No | <i>In silico</i> |
| Aust/Brooklands/2-93           | Australia | 1993 | JX565563 | Yes                                | Yes                                               | No | <i>In silico</i> |
| Aust/Southwell Hill/2-93       | Australia | 1993 | JX565575 | Yes                                | Yes                                               | No | <i>In silico</i> |
| Aust/Southwell Hill/11-93      | Australia | 1993 | KC660085 | Yes                                | Yes                                               | No | <i>In silico</i> |
| Aust/Brooklands/4-93           | Australia | 1993 | JX565562 | Yes                                | Yes                                               | No | <i>In silico</i> |
| Aust/OB1/Hall/3-94             | Australia | 1994 | JX565573 | Yes                                | Yes                                               | No | <i>In silico</i> |
| Aust/OB3/Hall/2-94             | Australia | 1994 | KC660083 | Yes                                | Yes                                               | No | <i>In silico</i> |
| Australia/Woodstock 1/3-94     | Australia | 1994 | JX565578 | Yes<br>(1 mis A/G in<br>the probe) | Yes                                               | No | <i>In silico</i> |
| Aust/Woodstock 1/3-94          | Australia | 1994 | JX565579 | Yes                                | Yes                                               | No | <i>In silico</i> |
| Aust/Brooklands/1-95           | Australia | 1995 | JX565564 | Yes<br>(1 mis A/G in<br>the probe) | Yes                                               | No | <i>In silico</i> |
| Aust/OB2/Hall/11-95            | Australia | 1995 | KC660081 | Yes                                | No                                                | No | <i>In silico</i> |
| Aust/Woodstock 6/11-95         | Australia | 1995 | JX565580 | Yes                                | Yes                                               | No | <i>In silico</i> |
| Aust/OB2/Hall/11-95            | Australia | 1995 | KC660081 | Yes                                | No                                                | No | <i>In silico</i> |
| Myxoma virus strain 6918       | Spain     | 1995 | EU552530 | Yes                                | No<br>(1 mis C/A in<br>the rev primer,<br>3' end) | No | <i>In silico</i> |
| Aust/OB3/Hall/2-96             | Australia | 1996 | KC660082 | Yes                                | Yes                                               | No | <i>In silico</i> |
| Aust/Southwell Hill/2-96       | Australia | 1996 | JX565583 | Yes                                | No                                                | No | <i>In silico</i> |
| Aust/Bulloo Downs/11-99        | Australia | 1999 | JX565584 | Yes                                | No                                                | No | <i>In silico</i> |
| Aust/Bulloo Downs/12-99        | Australia | 1999 | KC660079 | Yes                                | No                                                | No | <i>In silico</i> |
| Aust/Bulloo Downs/12-99        | Australia | 1999 | KC660079 | Yes                                | No                                                | No | <i>In silico</i> |
| Aust/Bulloo Downs/11-99        | Australia | 1999 | JX565584 | Yes                                | No                                                | No | <i>In silico</i> |
| Germany/2604/2004              | Germany   | 2004 | KP723389 | Yes                                | Yes                                               | No | <i>In silico</i> |
| Germany/FLI-H/2004             | Germany   | 2004 | KP723390 | Yes                                | Yes                                               | No | <i>In silico</i> |
| Germany/3207/2007              | Germany   | 2007 | KP723388 | Yes                                | Yes                                               | No | <i>In silico</i> |
| Scotland/Perthshire/1526/2008  | Scotland  | 2008 | KY548795 | Yes                                | Yes                                               | No | <i>In silico</i> |
| England/Yorkshire/127/2008     | England   | 2008 | KY548811 | Yes                                | Yes                                               | No | <i>In silico</i> |
| Aust/ACT/Acton/07-2008         | Australia | 2008 | MK388112 | Yes                                | No                                                | No | <i>In silico</i> |
| Yorkshire/127                  | UK        | 2008 | KY548811 | Yes                                | Yes                                               | No |                  |
| Scotland/ Perthshire/1754/2009 | Scotland  | 2009 | KY548797 | Yes                                | Yes                                               | No | <i>In silico</i> |

|                                   |           |      |                      |     |                                                |     |                               |
|-----------------------------------|-----------|------|----------------------|-----|------------------------------------------------|-----|-------------------------------|
| England/Yorkshire/135/2009        | England   | 2009 | KY548812             | Yes | No<br>(insertion of a<br>C, reverse<br>primer) | No  | <i>In silico</i>              |
| Perthshire/1754                   | Scotland  | 2009 | KY548797             | Yes | Yes                                            | No  | <i>In silico</i>              |
| Scotland/ Perthshire/2080/2010    | Scotland  | 2010 | KY548802             | Yes | Yes                                            | No  | <i>In silico</i>              |
| Scotland/ Perthshire/2256/2011    | Scotland  | 2011 | KY548806             | Yes | Yes                                            | No  | <i>In silico</i>              |
| England/Yorkshire/Col/2011        | England   | 2011 | KY548813             | Yes | No<br>(Insertion of a<br>C, reverse<br>primer) | No  | <i>In silico</i>              |
| Scotland/ Perthshire/2409/2012    | Scotland  | 2012 | KY548807             | Yes | Yes                                            | No  | <i>In silico</i>              |
| Aust/ACT/Acton/12-2012            | Australia | 2012 | MK388108             | Yes | No                                             | No  | <i>In silico</i>              |
| Aust/NSW/Euchareena (19)/10-2012  | Australia | 2012 | MK388101             | Yes | No                                             | No  | <i>In silico</i>              |
| Aust/SA/Turretfield(2992)/06-2012 | Australia | 2012 | MK388103             | Yes | No                                             | No  | <i>In silico</i>              |
| Scotland/ Perthshire/2524/2013    | Scotland  | 2013 | KY548810             | Yes | Yes                                            | No  | <i>In silico</i>              |
| Aust/ACT/Mulligans Flat/04-2013/2 | Australia | 2013 | MK388093             | Yes | No                                             | No  | <i>In silico</i>              |
| Aust/NSW/Euchareena (3)/02-2013   | Australia | 2013 | MK388096             | Yes | No                                             | No  | <i>In silico</i>              |
| Aust/SA/Monarto Zoo/11-2013       | Australia | 2013 | MK388114             | Yes | Yes                                            | No  | <i>In silico</i>              |
| Aust/SA/Wilpena/11-2014           | Australia | 2014 | MK388124             | Yes | No                                             | No  | <i>In silico</i>              |
| Aust/NSW/Carwoola/12-2014         | Australia | 2014 | MK388117             | Yes | No                                             | No  | <i>In silico</i>              |
| Aust/NSW/Murrumbateman/10-2014    | Australia | 2014 | MK388121             | Yes | No                                             | No  | <i>In silico</i>              |
| Aust/SA/Waterfall Gully/09-2015   | Australia | 2015 | MK388138             | Yes | No                                             | No  | <i>In silico</i>              |
| Aust/SA/Olympic Dam/08-2015       | Australia | 2015 | MK388142             | Yes | No                                             | No  | <i>In silico</i>              |
| Aust/SA/Qualco/01-2015            | Australia | 2015 | MK388120             | Yes | No                                             | No  | <i>In silico</i>              |
| Aust/NSW/Deniliquin/02-2015       | Australia | 2015 | MK388118             | Yes | No                                             | No  | <i>In silico</i>              |
| Aust/SA/Mt Gambier/09-2015        | Australia | 2015 | MK388135             | Yes | No                                             | No  | <i>In silico</i>              |
| Aust/SA/Kangarilla/09-2015        | Australia | 2015 | MK388136             | Yes | Yes                                            | No  | <i>In silico</i>              |
| Aust/ACT/Symonston/01-2016        | Australia | 2016 | MK388125             | Yes | No                                             | No  | <i>In silico</i>              |
| ha-MYXV / MYXV-Tol08/18           | Spain     | 2018 | MK836424<br>MK340973 | Yes | No                                             | Yes | <i>In silico and in vitro</i> |
| Myxo-RHD Plus                     | -         | -    | -                    | Yes | No                                             | No  | <i>In vitro</i>               |
| Dervaximyxo SG 33                 | France    | 2009 | GQ409969             | Yes | Yes                                            | No  | <i>In silico</i>              |
| Mixohipra-H VMI30                 | -         | -    | -                    | Yes | No                                             | No  | <i>In vitro</i>               |

|                                            |   |      |           |     |     |    |                  |
|--------------------------------------------|---|------|-----------|-----|-----|----|------------------|
| POX-LAP, strain Leon-162                   | - | -    | -         | Yes | No  | No | <i>In vitro</i>  |
| Dercunimix SG33                            | - | 2009 | GQ409969  | Yes | Yes | No | <i>In silico</i> |
| Rabbit fibroma virus (Kasza strain of SFV) |   | 1974 | NC_001266 | No  | No  | No | <i>In silico</i> |
| Mixohipra FSA                              | - | -    | -         | No  | No  | No | <i>In vitro</i>  |
| Mixovacina                                 | - | -    | -         | No  | No  | No | <i>In vitro</i>  |
| Lyomyxovax                                 | - | -    | -         | No  | No  | No | <i>In vitro</i>  |

\*In silico result meaning: Yes- primers and probe target sequences are 100% conserved. No- lack of amplification in the *in silico* PCR at 55°C FASTPCR 6.7 (PrimerDigital, 2020). mis-mismatch, D- doubtful.
